# Supplementary material for: Acute Versus Chronic Loss of Mammalian Azi1/Cep131 Results in Distinct Ciliary Phenotypes
Source: PLoS Genet. 2013 Dec 26;9(12):e1003928. doi: 10.1371/journal.pgen.1003928 (PMC3887133; doi:10.1371/journal.pgen.1003928)
Supplement: Table S4 — Primary antibodies. (XLSX) [file pgen.1003928.s015.xlsx]

## Sheet: Sheet1
Table S4 Primary antibodies
Antigen	Antibody/Clone Name	Host species	Dilution	Source	Species Reactivity	Application
a-tubulin	DM1A	Mouse	1:5000	Abcam	Ms, Hs	WB (1:5000)
g-tubulin	ab11317	Rabbit	1:500	Abcam	Ms, Hs	IF (1:500)
g-tubulin	GTU-88	Mouse	1:500	Sigma	Ms, Hs	IF (1:500)
Acetylated a-tubulin	6-11B-1	Mouse	1:2000	Sigma	Ms, Hs	IF (1:2000); p-IHC (1:1000)
Polyglutamylated tubulin	GT335	Mouse	1:2000	Enzo Life Sciences	Ms, Hs	1:2000 (IF)
Arl13b	n/a	Rabbit	1:1500	Gifty from T Caspary	Ms, Hs	1:1500 (IF)
Azi1	SF91	Guinea Pig	1:200-500	Gidt from J. Reiter	Hs	WB (1:200); IF (1:500)
AZI1	AB110018	Rabbit	1:100	Abcam	Ms, Hs	1:100 (IF)
Cleaved Caspase-3 (Asp175)	9661	Rabbit	1:250	Cell Signaling Technology	Ms	p-IHC (1:250)
CD71	LS-C105832	Rat	1:100	Lifespan Biotechnology	Ms	FACS (1:100)
Centrin3	3E6	Mouse	1:500	Novus	Ms, Hs	IF: 1:500
γ-H2AX (phospho S139)	Ab11174	Rabbit	1:500	Abcam	Ms, Hs	p-IHC (1:500) IF (1:500)
Hook1	10871-1-AP	Rabbit	1:50	Proteintech Group	Ms	p-IHC (1:50)
IFT88	13967-1-AP	Rabbit	1:80	Proteintech Group	Ms, Hs	IF (1:80)
Mks1/Bbs13	16206-1-AP	Rabbit	1:100	Proteintech Group	Ms, Hs	IF (1:100)
Nphp1	640	Rabbit	1:1000	Gift from G Pazour	Ms, Hs	IF (1:1000)
PCM1	sc-50164	Goat	1:100	Santa Cruz	Ms, Hs	IF (1:100)
Rab8	R5530	Rabbit	1:200	Sigma	Ms, Hs	IF (1:200)
